# Supplementary material
Source: publisher figshare collection journal article supplement (https://acs.figshare.com/ndownloader/files/5469359)
Supplement: Supplementary file 1 [file 5469359]

## Supporting Information

### **Paramagnetic phospholipid-based micelles targeting VCAM-1 receptors for the MRI visualization of inflammation**

Amerigo Pagoto,<sup>† #</sup> Rachele Stefania,<sup>†#</sup> Francesca Garelo,<sup>†</sup> Francesca Arena<sup>†</sup>, Giuseppe Digilio<sup>‡</sup>,  
Silvio Aime,<sup>†</sup> Enzo Terreno<sup>†\*</sup>

<sup>†</sup> Molecular & Preclinical Imaging Centers, Department of Molecular Biotechnology and Health Sciences, University of Torino, Via Nizza 52, 10126 – Torino, Italy

<sup>‡</sup> DISIT, Università del Piemonte Orientale “A. Avogadro”, Via T. Michel 11, 15121 Alessandria, Italy

<sup>#</sup> these authors contributed equally

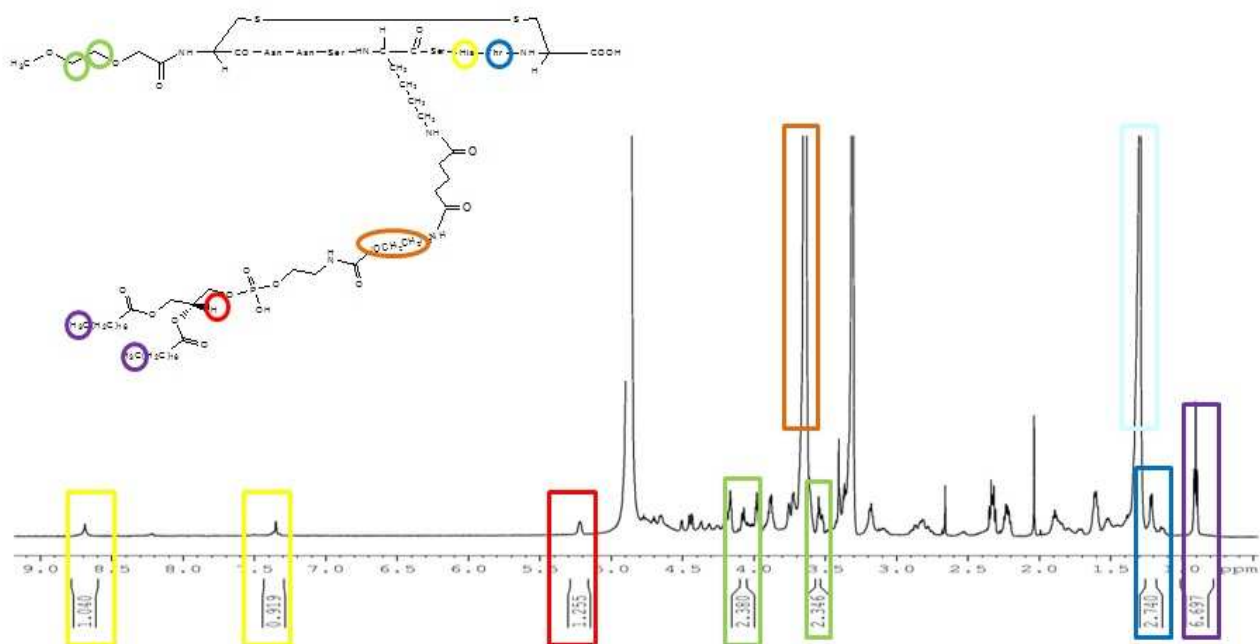

**Figure S1.  $^1\text{H}$ -NMR spectrum of DSPE-PEG2000-peptide.** Assignment of the principal  $^1\text{H}$ -NMR signals: CH groups of histidine (yellow), CH group of phospholipid (red),  $\text{CH}_2$  groups of (methoxyethoxy)acetic acid (green),  $\text{CH}_2$  groups of phospholipid (orange),  $\text{CH}_3$  group of threonine (blue),  $\text{CH}_3$  terminal groups of phospholipid (purple).

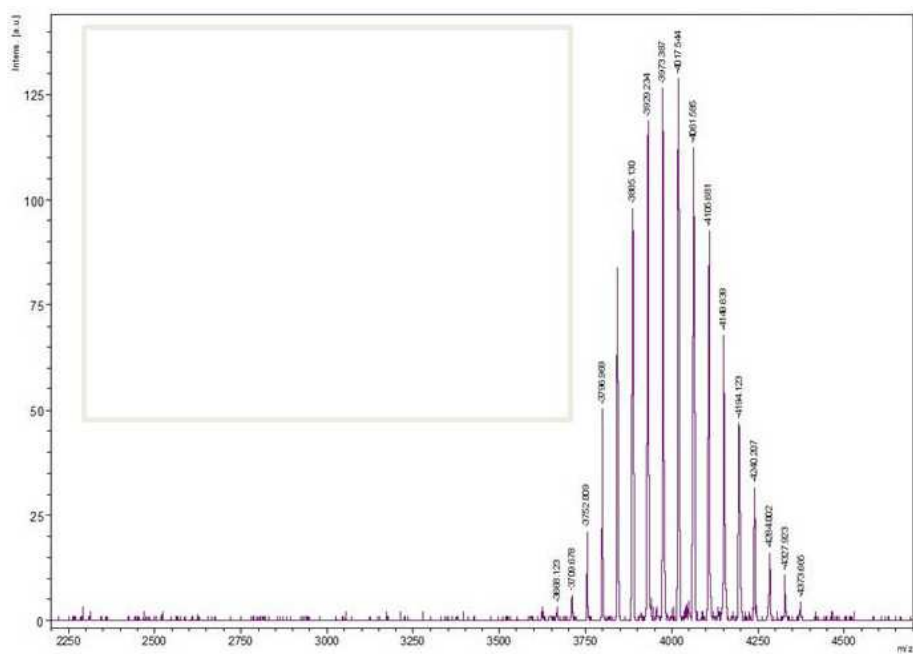

**Figure S2. MALDI-MS (positive ion mode) of the phospholipid conjugated to the targeting peptide.** The molecular mass of the product is 3973.387.

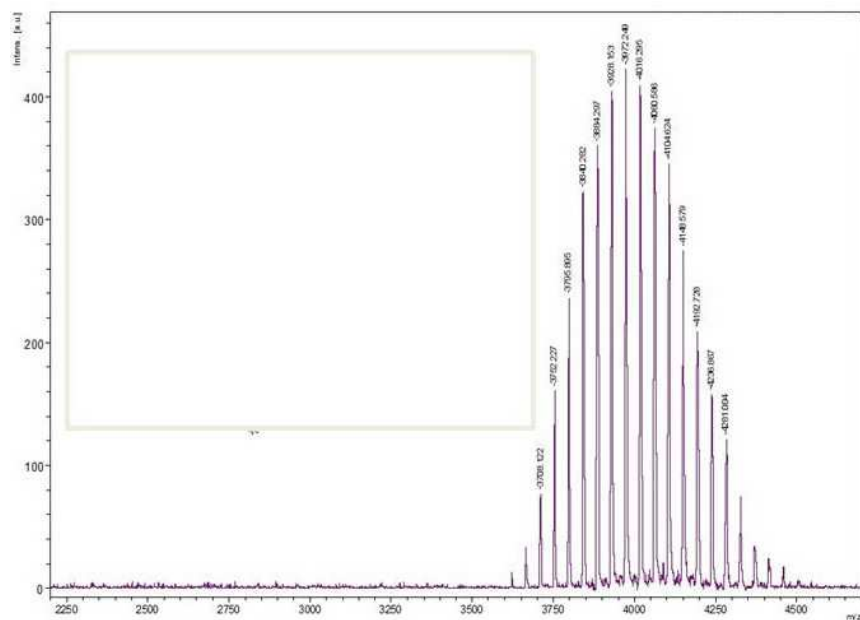

**Figure S3. MALDI-MS (negative ion mode) of the phospholipid conjugated to the targeting peptide.** The molecular mass of the product is 3972.249.

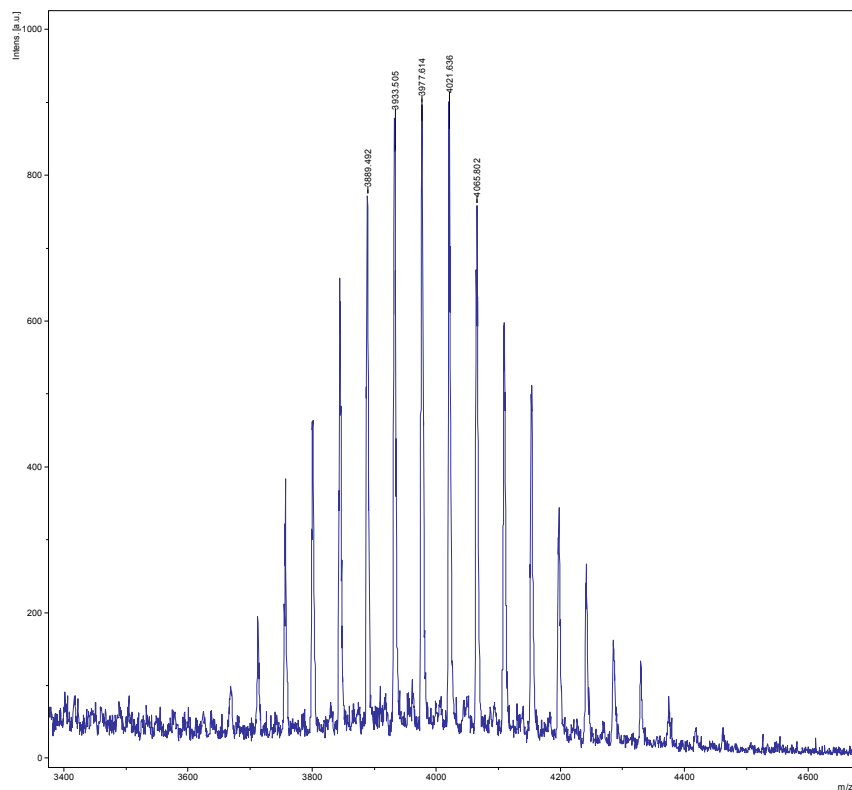

**Figure S4. MALDI-MS (positive ion mode) of the phospholipid conjugated to the scrambled peptide.** The molecular mass of the product is 3977.614.

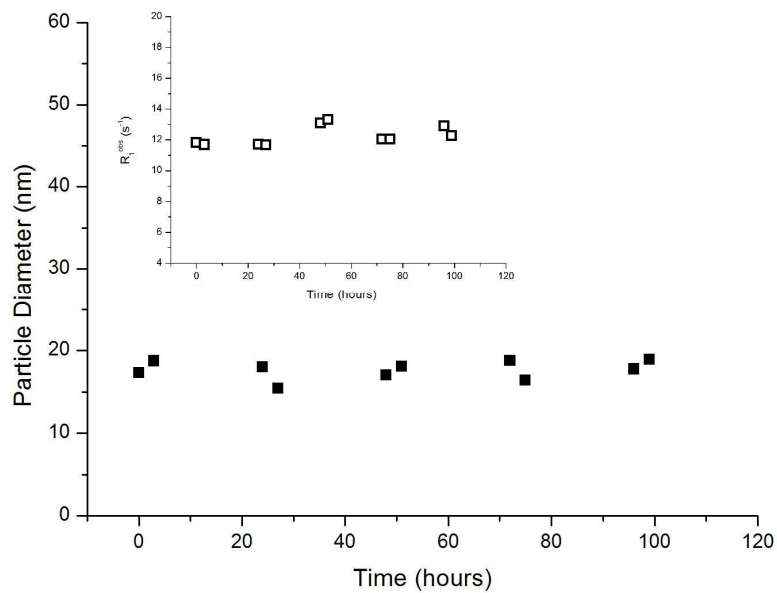

**Figure S5. *In vitro* stability of the micelles targeting VCAM-1 receptors.** DLS and relaxometric measurements over time of the Gd-loaded micelles targeting VCAM-1 receptors incubated at 37 °C with human serum.

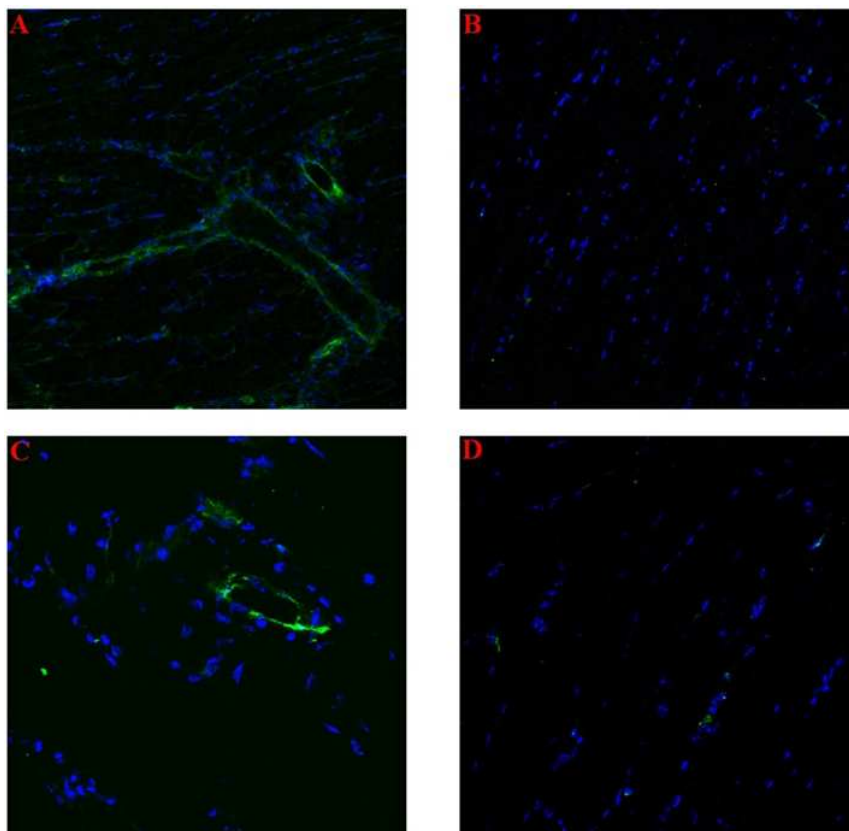

**Figure S6. Effect of LPS over the vascular cell adhesion molecule-1 (VCAM-1) expression in leg muscles.** Immunofluorescence was used to examine VCAM-1 overexpression in LPS-treated mice muscles in comparison with non treated healthy muscles. A and C represent respectively 20x and 40x confocal microscope images of stained inflamed tissue whereas B and D represent, at the same magnifications, stained healthy tissue (green: VCAM-1, blue: nuclei). As displayed in the images VCAM-1 is abundantly expressed in the inflamed endothelium, whereas a negligible basal expression is detectable in the healthy tissue.

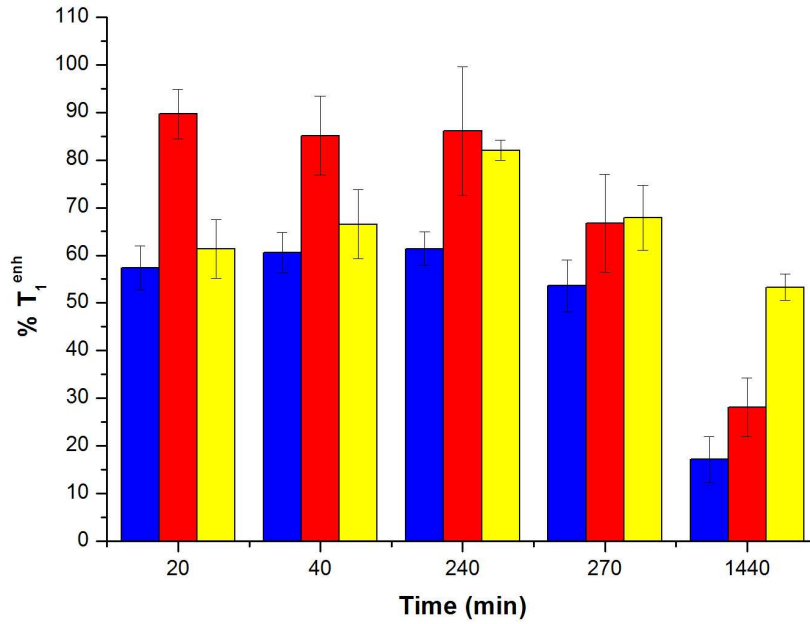

**Figure S7. MRI contrast measured in some organs at different time points after the injection of the micelles targeting VCAM-1 receptors.** Blue bars refer to kidneys, red bars to spleen and yellow bars to liver. Error bars represent SE of the mean.

| Spin | Shift | Label | Assign. |
|------|-------|-------|---------|
| 1    | 0.900 | HG1   | T8      |
| 2    | 3.950 | HB    | T8      |
| 3    | 4.206 | HA    | T8      |
| 4    | 7.843 | H     | T8      |
| 5    | 4.417 | HA    | H7      |
| 6    | 3.071 | HB    | H7      |
| 7    | 2.972 | HB2   | H7      |
| 8    | 7.955 | H     | H7      |
| 9    | 8.201 | HB    |         |
| 10   | 6.972 | HB2   |         |
| 11   | 8.225 | H     | K5      |
| 12   | 1.155 | HG    | K5      |
| 13   | 1.198 | HG2   | K5      |
| 14   | 1.374 | HD    | K5      |
| 15   | 1.416 | HD2   | K5      |
| 16   | 1.528 | HB    | K5      |
| 17   | 1.617 | HB2   | K5      |
| 18   | 2.696 | HE    | K5      |
| 19   | 2.733 | HE2   | K5      |
| 20   | 3.984 | HA    | K5      |
| 21   | 4.183 | HA    | C9      |
| 22   | 8.002 | H     | C9      |
| 23   | 2.974 | HB    | C9      |
| 24   | 2.766 | HB2   | C9      |
| 25   | 7.370 | HA    |         |

| Spin | Shift | Label | Assign. |
|------|-------|-------|---------|
| 26   | 6.690 | HB    |         |
| 27   | 8.185 | H     | N3      |
| 28   | 2.506 | HB    | N3      |
| 29   | 2.601 | HB2   | N3      |
| 30   | 4.470 | HA    | N3      |
| 31   | 3.459 | HA    |         |
| 32   | 3.370 | HB    |         |
| 33   | 8.036 | H     | S4      |
| 34   | 4.184 | HA    | S4      |
| 35   | 3.734 | HB    | S4      |
| 36   | 3.610 | HB2   | S4      |
| 37   | 3.851 | II    |         |
| 38   | 3.108 | H     |         |
| 39   | 7.798 | H     | S6      |
| 40   | 4.140 | HA    | S6      |
| 41   | 3.599 | HB    | S6      |
| 42   | 3.524 | HB2   | S6      |
| 43   | 8.492 | H     | N2      |
| 44   | 2.484 | HB2   | N2      |
| 45   | 2.518 | HB    | N2      |
| 46   | 4.437 | HA    | N2      |
| 47   | 8.199 | H     | C1      |
| 48   | 4.409 | HA    | C1      |
| 49   | 2.800 | HB2   | C1      |
| 50   | 2.887 | HB    | C1      |

**Table S1. Complete assignment of the 2D-NMR TOCSY spectrum of the peptide targeting VCAM-1 receptors.** The chemical shift and label of each proton are reported in the first and second column, respectively. In the third column the corresponding aminoacids are reported.
